# Supplementary material for: Discovery of new crystal structures of iodide perovskites CsPbI 3 and RbPbI 3 using density functional theory
Source: Royal Society of Chemistry journal article supplement (doi:10.1039/d5nj01515d), 2025-01-01
Supplement: d5nj01515d10.xlsx [file d5nj01515d10.xlsx]

## Sheet: Sheet1
Structures	Space group	CsPbI3	PbCsI3	RbPbI3	PbRbI3
AgIO3-29	Pca21	-13.9728		-13.9273
AgNO3	R3c		-14.1356		-14.0433
AgNO3-161	R3c		-14.1317		-14.0429
AlHoO3	Pbnm	-14.1747		-14.0986
AlInS3	P61	-13.892		-13.8162
AlYO3	Pbnm		-14.1748		-14.0986
AsLiO3-15	C2/c		-14.0229		-13.9053
BaBiSe3-19	P212121	-14.0285		-13.9236
BaCO3-62	Pnma		-13.8902		-13.8594
BaCoO3	P63/mmc		-11.2043		-11.1643
BaGeO3-19	P212121	-14.0396		-13.9287
BaLiD3-221	Pm-3m	-14.0614		-13.8292
BaNiO3-186	P63mc		-13.2546		-13.0533
BaPbO3	Imma	-14.143		-14.0341
BaSbTe3-19	P212121		-14.0401		-13.9322
BaTbO3	R3c	-14.1378		-14.0434
BaTeO3	P21/m	-14.0844		-14.0106
BaTeO3-62	Pnma	-13.6863		-13.6161
BaTeS3	Pnma	-14.1928		-14.0494
BaTiO3	R3m		-12.5749		-12.0172
BaVSe3-194	P63/mmc	-14.1321		-13.9152
BeCsF3	Pnma	-14.1896		-14.0472
Br3CdRb-62	Pnma	-14.2262		-14.1347
BrNO3-19	P212121	-14.0268		-13.981
CaClO3	P21/c		-13.4304		-13.3897
CaCO3-62	Pnma(2)		-14.1928		-14.0494
CaIrO3-63	Cmcm	-14.1688		-14.1099
CaSnO3	R3	-14.1058		-14.0704
CaTiO3-62	Pbnm	-14.1753		-14.0991
CdCO3-167	R-3c	-11.0308		-11.4085
CdGeO3	C2/c	-14.0245		-13.9062
CdTiO3-148	R3	-14.1046		-14.0697
CdTiO3-33	Pbnm		-14.1752		-14.0988
CeSiP3	Pna21		-13.9067		-13.806
CoSeO3	Pbnm		-14.1763		-14.0997
CrRbCl3_1	C2	-14.175		-14.0284
CsBeF3-62	Pnma(2)		-14.1892		-14.0459
CsCrI3-60	Pbcn	-13.7294		-13.6555
CsCuBr3-20	C2221	-14.1675		-14.0484
CsCuCl3-178	P6122	-14.1271		-14.0973
CsGeCl3-146	R3m	-14.0759		-13.8947
CsNbO3	P21/c	-14.1596		-14.0722
CsSnCl3-14	P21/c	-14.0464		-13.9363
CrRbCl3	C2/m	-14.1749		-14.0211
CsSnI3-62	Pnma	-14.2262		-14.1344
CsVO3	Pbcm	-13.4928		-13.584
CuGeO3-26	Pmma		-13.2192		-13.2975
CuKF3	I4/mcm	-14.0638		-13.8306
CuKF3-127	I4/mcm	-14.0638		-13.8307
CuKF3-19	P212121		-14.0396		-13.9287
CuSeO3	Pbnm		-14.1769		-14.0989
CuTeO3-62	Pnma	-13.8966		-13.8228
CuVO3	P1	-13.5395		-13.8928
Eu3Ge3S9	P-1	-14.0038		-13.9616
Fe2P2S6-12	C2/m		-14.0051		-13.9502
Fe2P2Se6-146	R3		-14.1098		-14.0725
FeS3U	Cmcm		-14.1691		-14.1078
FeTiO3	R-3	-14.1018		-14.0684
GaGdO3-62	Pbnm		-14.1779		-14.0996
GaNdO3-33	Pbnm		-14.1775		-14.1
GaYO3	P63cm	-13.6645		-13.7034
GdFeO3-62	Pbnm		-14.176		-14.0975
GdTiO3	Pbnm		-14.1774		-14.0984
GePbS3	Pnma(2)		-14.1928		-14.0495
GeRbCl3-11	P21/m	-14.0844		-14.0105
Hg2P2S6	P-1		-14.1065		-14.071
Hg2P2Se6	C2/c		-14.0056		-13.9506
HgTiO3-161	R3c	-14.1319		-14.0429
HoNiO3-62	Pbnm	-14.1775		-14.0994
HoVO3	Pbnm	-14.1775		-14.0997
InYO3	P63cm		-13.7741		-13.7442
IrKO3	Pn-3		-14.0003		-13.8953
KAgF3-62	I4/mcm	-14.0638		-13.8306
KClO3-62	Pcmn		-14.0843		-14.0105
KClO3_1	R3m		-14.0757		-13.8947
KFeBr3	Pnma	-14.2291		-14.1366
KFeCl3	Pnma	-14.2291		-14.1366
KFeF3-221	Pm-3m	-14.0614		-13.8292
KFeF3-62	Pnma	-14.2291		-14.1366
KMnF3	P4/mbm	-14.1427		-14.0007
KNbO3-38	Amm2	-14.0647		-13.8832
KNiCl3-185	P63cm	-14.1885		-14.0405
KPbF3-62	I4/mcm	-14.0638		-13.8306
KPO3-62	Pnma(2)		-14.1892		-14.0459
LaBO3-11	P21/m	-14.0828		-14.0097
LaCrO3	Pbnm	-14.1775		-14.0997
LaErO3-62	Pbnm	-14.1772		-14.0995
LaMnO3-62	Pbnm	-14.1776		-14.0997
LaTiO3	Pbnm	-14.1775		-14.0997
LaYbO3-33	Pbnm		-14.1774		-14.0996
LiBaH3-221	Pm-3m	-14.0614		-13.8292
LiIO3-182	P63		-14.1518		-14.0968
LiIO3_1	P63		-14.1518		-14.0968
LiSbO3-52	Pnna	-14.0522		-14.0285
LiTaO3	R3c		-14.1317		-14.0429
LiVO3	C2/c	-14.0245		-13.9062
LuBO3-167	R3c		-14.1317		-14.0429
LuMnO3-185	P63cm	-13.7725		13.7433
MgCO3-167	R3c		-14.1317		-14.0429
MgRbCl3	P63/mmc	-14.1322		-13.9153
MgSeO3	Pbnm		-14.1774		-14.0995
MgSiO3-14	P21/c	-13.9983		-13.0896
MgVO3	Cmc21		-14.1381		-13.9468
MnCsBr3-194	P63/mmc	-14.1321		-13.9152
MnCsCl3	R3m	-14.109		-13.9169
MnRbCl3	P63/mmc	-14.1321		-13.9152
MnRbSr3	P63/mmc	-14.1321		-13.9152
MnSeO3	Pbnm		-14.1762		-14.0974
MnSO3-148	R-3		-13.9671		-13.9077
NaAsO3-2	P-1		-14.038		-13.9625
NaClO3-14	P21/c	-14.1067		-14.0311
NaCoF3	Pbnm	-14.1762		-14.0974
NaIO3-33	Pbnm		-14.1761		-14.0975
NaMnCl3	R3c	-14.1356		-14.0433
NaMnF3-62	Pbnm	-14.1761		-14.0974
NaNbO3	R3c	-14.13		-14.0214
NaNbO3-57	Pbcm	-13.8022		-13.7016
P4Tl4O12	P421c		-13.9684		-13.8716
PbClO3	Pnma(2)	-14.1892		-14.0459
PbRbI3	Pnma	-14.2291		-14.1366
PbSnS3-62	Pnma	-14.2291		-14.1366
PbTlI3	Cmcm		-14.1726		-14.1124
PbZrS3	Pnma	-14.2291		-14.1366
PrMnO3-62	Pbnm	-14.1761		-14.0975
RbAgF3-140	I4/mcm	-14.0638		-13.8307
RbCrI3	C2	-14.175		-14.0285
RbCuCl3-5	C2	-14.175		-14.0284
RbCuCl3-60	P63/mmc	-14.1322		-13.9153
RbGeI3-19	Pnma	-14.2262		-14.1343
RbHgF3-221	Pm-3m	-14.076		-13.8437
RbMgCl3-194	P63/mmc(2)	-14.0887		-13.8841
RbMnBr3-194	P63/mmc	-14.1322		-13.9153
RbNbO3-2	P-1	-14.1048		-14.0076
RbNiCl3-194	P63/mmc	-14.1322		-13.9153
RbNO3-59	Pmmn	-14.0059		-13.9375
RbPO3-14	P21/c		-13.9887		-13.9127
RbTaO3	C2/m	-14.0953		-14.0111
RbVO3	Pbcm	-13.7718		-13.7348
SbTlO3	P-31c		-14.0978		-14.0581
ScUS3	Cmcm		-14.1692		-14.1078
ScYS3-33	Pbnm	-14.1775		-14.0999
SeZnO3-62	Pbnm	-14.1757		-14.0996
SiZnO3-15	C2/c	-13.8553		-13.7711
SmAlO3-62	Pbnm	-14.1757		-14.0992
SmBO3-1	P1		-14.0231		-13.9473
SmTiO3	Pbnm	-14.1757		-14.0992
Sn2P2S6-7	Pc		-14.0844		-14.0106
SrIrO3-15	C2/c		-13.9431		-13.8486
SrPbO3	Pbnm	-14.1757		-14.0992
SrZrO3-62	Pbnm	-14.1757		-14.0992
SrZrO3_2	Cmcm	-14.1506		-14.0356
SrZrS3-62	Pbnm	-14.1757		-14.0994
TaRbO3	C2/m		-14.0953		-14.0111
TbFeO3-62	Pbnm		-14.1757		-14.0993
TbMnO3-62	Pbnm	-14.1757		-14.0994
TiGdO3	Pbnm		-14.1757		-14.0994
TiNdO3	Pbnm		-14.1756		-14.0994
TiSmO3	Pbnm		-14.1756		-14.0994
TiVO3	Pbcm	-13.8019		-13.7014
TiYO3	Pbnm		-14.1756		-14.0994
TlCdI3	Pnma	-14.2291		-14.1366
TlMnCl3-62	Pbnm	-14.1775		-14.0999
TlNO3	Pnma	-13.8717		-13.834
TlSbO3-163	P-31c	-14.0978		-14.0582
TlSbO3-182	P6322	-14.0877		-14.0342
TmFeO3-62	Pbnm	-14.1756		-14.0994
YFeO3-33	Pbnm	-14.1756		-14.0994
ZnSeO3	Pbnm		-14.1756		-14.0994
ZnSiO3	C2/c	-14.0251		-13.9069
ZnTeO3-61	Pbca		-14.0344		-14.0103
ZnTiO3-148	R-3	-14.1064		-14.0709
ZrSrO3	Pbnm		-14.1757		-14.0994
